# Supplementary material
Source: MDPI journal article supplement (https://www.mdpi.com/2073-4395/14/3/601)
Supplement: s1 [file s1]

# Supplementary materials

**Table S1.** The primers and protocols of PCR amplification.

| Target region   | Primers | Sequence                     | PCR protocols                                                                                     |
|-----------------|---------|------------------------------|---------------------------------------------------------------------------------------------------|
| Bacterial V3-V4 | 338F    | 5'-ACTCCTACGGGAGGCAGCAG-3'   | 95 °C for 3 min, 95 °C for 30 s,<br>55 °C for 30 s, 72 °Cfor 45 s, 27<br>cycles, 72 °C for 10 min |
|                 | 806R    | 5'-GGACTACHVGGGTWTCTAAT-3'   |                                                                                                   |
| Fungal ITS      | ITS1F   | 5'-CTTGGTCATTTAGAGGAAGTAA-3' | 95 °C for 3 min, 95 °C for 30 s,<br>55 °C for 30 s, 72 °Cfor 45 s, 35<br>cycles, 72 °C for 10 min |
|                 | ITS2R   | 5'-GCTGCGTTCTTCATCGATGC-3'   |                                                                                                   |

**Table S2.** Fresh weight of plants and soil physicochemical properties under phthalic acid.

|        | Fresh weight<br>(g)     | WC (g)                 | TP (mg/kg)                | TK(g/kg)               | SOM(g/kg)               | NO <sub>3</sub> <sup>-</sup> -N<br>(mg/kg) | NH <sub>4</sub> <sup>+</sup> -N<br>(mg/kg) | TN(mg/kg)                  | pH                      |
|--------|-------------------------|------------------------|---------------------------|------------------------|-------------------------|--------------------------------------------|--------------------------------------------|----------------------------|-------------------------|
| L1-15d | 24.22±0.18 <sup>a</sup> | 0.24±0.00 <sup>a</sup> | 1015.78±6.38 <sup>a</sup> | 3.57±0.03 <sup>a</sup> | 47.00±0.80 <sup>a</sup> | 22.99±0.73 <sup>ab</sup>                   | 11.37±0.83 <sup>c</sup>                    | 1821.9±3.37 <sup>a</sup>   | 5.62±0.11 <sup>d</sup>  |
| L2-15d | 18.24±0.10 <sup>d</sup> | 0.19±0.00 <sup>c</sup> | 841.65±5.56 <sup>c</sup>  | 3.51±0.02 <sup>b</sup> | 39.05±2.48 <sup>b</sup> | 22.63±0.47 <sup>ab</sup>                   | 6.86±0.08 <sup>c</sup>                     | 1477.59±14.92 <sup>c</sup> | 4.74±0.13 <sup>c</sup>  |
| L3-15d | 15.72±0.25 <sup>f</sup> | 0.16±0.00 <sup>g</sup> | 641.19±5.12 <sup>f</sup>  | 3.46±0.02 <sup>c</sup> | 35.15±3.55 <sup>c</sup> | 21.53±0.58 <sup>bc</sup>                   | 6.18±0.17 <sup>c</sup>                     | 1142.93±32.91 <sup>c</sup> | 4.33±0.10 <sup>f</sup>  |
| L1-30d | 21.11±0.12 <sup>b</sup> | 0.21±0.00 <sup>d</sup> | 1004.47±5.59 <sup>a</sup> | 3.41±0.04 <sup>c</sup> | 38.66±1.28 <sup>c</sup> | 21.54±1.54 <sup>bc</sup>                   | 14.01±0.52 <sup>a</sup>                    | 1191.40±11.00 <sup>d</sup> | 5.84±0.13 <sup>c</sup>  |
| L2-30d | 17.68±0.10 <sup>c</sup> | 0.18±0.00 <sup>f</sup> | 696.87±11.72 <sup>d</sup> | 3.19±0.02 <sup>d</sup> | 26.65±1.32 <sup>c</sup> | 23.24±1.17 <sup>a</sup>                    | 12.97±0.81 <sup>b</sup>                    | 924.40±9.64 <sup>g</sup>   | 5.72±0.09 <sup>cd</sup> |
| L3-30d | 15.37±0.35 <sup>f</sup> | 0.14±0.00 <sup>h</sup> | 656.4±4.53 <sup>c</sup>   | 3.43±0.03 <sup>c</sup> | 24.79±1.28 <sup>c</sup> | 20.25±0.64 <sup>c</sup>                    | 8.49±0.45 <sup>d</sup>                     | 654.00±4.703 <sup>h</sup>  | 6.09±0.07 <sup>a</sup>  |
| CK-15d | 19.55±0.15 <sup>c</sup> | 0.22±0.00 <sup>b</sup> | 920.04±6.52 <sup>b</sup>  | 3.45±0.02 <sup>a</sup> | 37.08±0.95 <sup>c</sup> | 22.47±0.586 <sup>ab</sup>                  | 14.88±0.41 <sup>a</sup>                    | 1651.23±13.67 <sup>b</sup> | 5.88±0.12 <sup>bc</sup> |
| CK-30d | 19.49±0.69 <sup>c</sup> | 0.22±0.00 <sup>c</sup> | 914.6±7.75 <sup>b</sup>   | 3.34±0.03 <sup>b</sup> | 32.78±0.46 <sup>d</sup> | 20.15±0.13 <sup>c</sup>                    | 12.89±0.47 <sup>b</sup>                    | 1041.40±6.92 <sup>f</sup>  | 6.06±0.04 <sup>ab</sup> |

Note: Different superscript lowercase letters indicate the data within each concentration treatment are significant different at P <0.05.

**Table S3.** Fresh weight of plants and soil physicochemical properties under palmitic acid.

|        | <b>Fresh weight</b>      | <b>WC</b>               | <b>TP</b>                 | <b>TK</b>              | <b>SOM</b>               | <b>NO<sub>3</sub><sup>-</sup>-N</b> | <b>NH<sub>4</sub><sup>+</sup>-N</b> | <b>TN</b>                   | <b>pH</b>              |
|--------|--------------------------|-------------------------|---------------------------|------------------------|--------------------------|-------------------------------------|-------------------------------------|-----------------------------|------------------------|
|        | <b>(g)</b>               | <b>(g)</b>              | <b>(mg/kg)</b>            | <b>(g/kg)</b>          | <b>(g/kg)</b>            | <b>(mg/kg)</b>                      | <b>(mg/kg)</b>                      | <b>(mg/kg)</b>              |                        |
| P1-15d | 24.37±0.08 <sup>a</sup>  | 0.25±0.00 <sup>a</sup>  | 975.35±12.31 <sup>a</sup> | 3.45±0.02 <sup>b</sup> | 45.37±2.67 <sup>a</sup>  | 23.13±0.74 <sup>b</sup>             | 10.74±0.98 <sup>c</sup>             | 1577.43±15.15 <sup>c</sup>  | 5.28±0.08 <sup>c</sup> |
| P2-15d | 18.87±0.50 <sup>d</sup>  | 0.22±0.01 <sup>c</sup>  | 891.43±5.57 <sup>c</sup>  | 3.58±0.02 <sup>a</sup> | 41.06±4.67 <sup>b</sup>  | 20.15±0.11 <sup>d</sup>             | 6.50±0.89 <sup>d</sup>              | 1194.58±40.039 <sup>d</sup> | 5.12±0.10 <sup>c</sup> |
| P3-15d | 16.34±0.12 <sup>f</sup>  | 0.19±0.00 <sup>c</sup>  | 664.68±30.18 <sup>c</sup> | 3.55±0.03 <sup>a</sup> | 42.19±0.77 <sup>ab</sup> | 24.46±0.51 <sup>a</sup>             | 6.34±0.803 <sup>d</sup>             | 1702.76±9.40 <sup>a</sup>   | 4.71±0.11 <sup>d</sup> |
| P1-30d | 21.00±0.38 <sup>b</sup>  | 0.24±0.00 <sup>b</sup>  | 982.87±4.46 <sup>a</sup>  | 3.37±0.02 <sup>c</sup> | 29.31±1.24 <sup>dc</sup> | 21.50±0.84 <sup>c</sup>             | 14.95±0.26 <sup>a</sup>             | 1059.93±3.06 <sup>c</sup>   | 5.84±0.74 <sup>b</sup> |
| P2-30d | 18.03±0.20 <sup>c</sup>  | 0.21±0.01 <sup>d</sup>  | 833.33±14.01 <sup>d</sup> | 3.27±0.03 <sup>d</sup> | 26.66±1.46 <sup>c</sup>  | 23.35±0.26 <sup>b</sup>             | 10.71±0.27 <sup>c</sup>             | 800.33±23.14 <sup>f</sup>   | 5.84±0.12 <sup>b</sup> |
| P3-30d | 15.48±0.34 <sup>e</sup>  | 0.17±0.00 <sup>f</sup>  | 642.33±2.04 <sup>c</sup>  | 3.30±0.01 <sup>d</sup> | 30.52±1.00 <sup>d</sup>  | 24.60±0.28 <sup>a</sup>             | 7.25±0.33 <sup>d</sup>              | 686.67±13.42 <sup>e</sup>   | 5.86±0.10 <sup>b</sup> |
| CK-15d | 19.55±0.15 <sup>c</sup>  | 0.22±0.00 <sup>c</sup>  | 920.04±6.52 <sup>b</sup>  | 3.46±0.02 <sup>b</sup> | 37.08±0.95 <sup>c</sup>  | 22.47±0.59 <sup>b</sup>             | 14.88±0.41 <sup>a</sup>             | 1651.23±13.67 <sup>b</sup>  | 5.88±0.12 <sup>b</sup> |
| CK-30d | 19.49±0.69 <sup>cd</sup> | 0.22±0.00 <sup>cd</sup> | 914.60±7.75 <sup>b</sup>  | 3.35±0.03 <sup>c</sup> | 32.78±0.46 <sup>d</sup>  | 20.15±0.13 <sup>d</sup>             | 12.89±0.47 <sup>b</sup>             | 1041.40±6.92 <sup>c</sup>   | 6.06±0.04 <sup>a</sup> |

Note: Different superscript lowercase letters indicate the data within each concentration treatment are significant different at P < 0.05.

**Table S4.** Fresh weight of plants and soil physicochemical properties under mixed organic acid.

|         | Fresh weight (g)          | WC (g)                  | TP (mg/kg)                | TK(g/kg)                | SOM(g/kg)                | NO <sub>3</sub> <sup>-</sup> -N (mg/kg) | NH <sub>4</sub> <sup>+</sup> -N (mg/kg) | TN(mg/kg)                  | pH                     |
|---------|---------------------------|-------------------------|---------------------------|-------------------------|--------------------------|-----------------------------------------|-----------------------------------------|----------------------------|------------------------|
| LP1-15d | 23.29±0.5619 <sup>a</sup> | 0.23±0.00 <sup>a</sup>  | 905.62±3.94 <sup>d</sup>  | 3.45±0.03 <sup>a</sup>  | 38.77±1.77 <sup>ab</sup> | 21.49±1.16 <sup>bc</sup>                | 10.03±1.24 <sup>c</sup>                 | 1256.25±42.02 <sup>c</sup> | 5.66±0.03 <sup>c</sup> |
| LP2-15d | 17.92±0.76 <sup>c</sup>   | 0.22±0.00 <sup>bc</sup> | 691.67±5.01 <sup>g</sup>  | 3.47±0.06 <sup>a</sup>  | 35.30±0.14 <sup>c</sup>  | 20.74±0.97 <sup>bc</sup>                | 10.91±0.95 <sup>c</sup>                 | 1115.92±91.15 <sup>d</sup> | 5.09±0.03 <sup>d</sup> |
| LP3-15d | 14.53±0.36 <sup>e</sup>   | 0.18±0.00 <sup>e</sup>  | 731.03±10.50 <sup>f</sup> | 3.45±0.03 <sup>a</sup>  | 31.32±0.61 <sup>d</sup>  | 25.57±1.33 <sup>a</sup>                 | 12.57±0.18 <sup>b</sup>                 | 2032.19±15.13 <sup>a</sup> | 5.07±0.05 <sup>d</sup> |
| LP1-30d | 19.01±0.27 <sup>b</sup>   | 0.19±0.00 <sup>d</sup>  | 971.00±1.40 <sup>b</sup>  | 3.24±0.01 <sup>d</sup>  | 28.347±1.48 <sup>e</sup> | 20.90±0.71 <sup>bc</sup>                | 13.37±0.58 <sup>b</sup>                 | 997.47±4.30 <sup>e</sup>   | 4.83±0.09 <sup>e</sup> |
| LP2-30d | 16.63±0.54 <sup>d</sup>   | 0.18±0.00 <sup>e</sup>  | 759.80±4.386 <sup>e</sup> | 3.33±0.04 <sup>bc</sup> | 21.45±2.04 <sup>f</sup>  | 20.40±0.46 <sup>bc</sup>                | 7.36±0.57 <sup>d</sup>                  | 598.13±9.75 <sup>f</sup>   | 4.74±0.08 <sup>e</sup> |
| LP3-30d | 13.55±0.33 <sup>f</sup>   | 0.23±0.00 <sup>a</sup>  | 1012.73±8.30 <sup>a</sup> | 3.28±0.03 <sup>cd</sup> | 40.57±1.90 <sup>a</sup>  | 26.26±2.36 <sup>a</sup>                 | 12.91±0.53 <sup>b</sup>                 | 1035.80±16.89 <sup>e</sup> | 5.85±0.11 <sup>b</sup> |
| CK-15d  | 19.55±0.15 <sup>b</sup>   | 0.22±0.00 <sup>ab</sup> | 920.04±6.52 <sup>c</sup>  | 3.46±0.02 <sup>a</sup>  | 37.08±0.95 <sup>bc</sup> | 22.47±0.59 <sup>b</sup>                 | 14.88±0.41 <sup>a</sup>                 | 1651.23±13.67 <sup>d</sup> | 5.88±0.12 <sup>b</sup> |
| CK1-30d | 19.49±0.69 <sup>b</sup>   | 0.22±0.00 <sup>c</sup>  | 914.60±7.75 <sup>cd</sup> | 3.35±0.03 <sup>b</sup>  | 32.78±0.46 <sup>d</sup>  | 20.15±0.13 <sup>c</sup>                 | 12.89±0.47 <sup>b</sup>                 | 1041.40±6.92 <sup>e</sup>  | 6.06±0.04 <sup>a</sup> |

Note: Different superscript lowercase letters indicate the data within each concentration treatment are significant different at P < 0.05.

**Table S5.** Correlation between microbial (Bacterial, fungal) community and edaphic factors (R value) (\*p < 0.05, \*\*p < 0.01, \*\*\*p < 0.001)

|                                 | Bacteria |         |                |          | Fungus  |         |                |          |
|---------------------------------|----------|---------|----------------|----------|---------|---------|----------------|----------|
|                                 | RDA1     | RDA2    | r <sup>2</sup> | p_values | RDA1    | RDA2    | r <sup>2</sup> | p_values |
| Bacteria                        |          |         |                |          |         |         |                |          |
| pH                              | -0.9652  | -0.2616 | 0.1154         | 0.034*   | -0.998  | 0.0628  | 0.2877         | 0.001*** |
| SOM                             | -0.9349  | -0.355  | 0.1487         | 0.009**  | 0.4181  | -0.9084 | 0.0005         | 0.985    |
| TN                              | -0.7873  | -0.6166 | 0.2121         | 0.002**  | 0.8743  | 0.4854  | 0.0748         | 0.116    |
| TP                              | -0.9976  | -0.0689 | 0.091          | 0.077    | -0.9986 | -0.0527 | 0.1464         | 0.01*    |
| NO <sub>3</sub> <sup>-</sup> -N | -0.9651  | -0.2617 | 0.0516         | 0.235    | 0.1918  | -0.9814 | 0.0727         | 0.104    |
| NH <sub>4</sub> <sup>+</sup> -N | -0.9932  | -0.1163 | 0.0393         | 0.325    | -0.9686 | 0.2485  | 0.2198         | 0.003**  |
| TK                              | -0.7375  | -0.6753 | 0.1583         | 0.011*   | 0.8275  | 0.5614  | 0.15           | 0.014*   |
| WC                              | -0.986   | -0.1667 | 0.1776         | 0.006**  | -0.9339 | 0.3575  | 0.0904         | 0.068    |



**Table S6.** Different coefficients of bacterial network complexity.

|         | <b>Node<br/>number</b> | <b>Edge<br/>number</b> | <b>Average<br/>degree</b> | <b>Graph<br/>diameter</b> | <b>Graph<br/>density</b> | <b>Clustering<br/>coefficient</b> | <b>Average<br/>Path length</b> |
|---------|------------------------|------------------------|---------------------------|---------------------------|--------------------------|-----------------------------------|--------------------------------|
| CK-15d  | 100                    | 671                    | 13.42                     | 8                         | 0.136                    | 0.076                             | 3.573                          |
| LL-15d  | 100                    | 695                    | 13.9                      | 5                         | 0.14                     | 0.147                             | 2.791                          |
| LH-15d  | 99                     | 316                    | 6.384                     | 13                        | 0.065                    | 0.569                             | 4.755                          |
| CK-30d  | 100                    | 993                    | 19.86                     | 5                         | 0.201                    | 0.136                             | 1.781                          |
| LL-30d  | 92                     | 387                    | 8.413                     | 6                         | 0.092                    | 0.07                              | 2.812                          |
| LH-30d  | 95                     | 292                    | 6.17                      | 13                        | 0.065                    | 0.547                             | 4.565                          |
| LPL-15d | 100                    | 856                    | 17.2                      | 6                         | 0.173                    | 0.152                             | 2.812                          |
| LPH-15d | 83                     | 522                    | 12.578                    | 8                         | 0.153                    | 0.557                             | 2.946                          |
| LPL-30d | 100                    | 791                    | 15.82                     | 3                         | 0.16                     | 0.403                             | 1.768                          |
| LPH-30d | 83                     | 448                    | 10.795                    | 12                        | 0.132                    | 0.554                             | 3.483                          |
| PL-15d  | 99                     | 900                    | 18.182                    | 8                         | 1.186                    | 0                                 | 3.368                          |
| PH-15d  | 80                     | 426                    | 10.65                     | 12                        | 0.135                    | 0.579                             | 3.951                          |
| PL-30d  | 79                     | 630                    | 15.949                    | 6                         | 0.204                    | 0.266                             | 2.877                          |
| PH-30d  | 84                     | 379                    | 9.024                     | 12                        | 0.109                    | 0.518                             | 3.978                          |

**Table S7.** Different coefficients of fungal network complexity.

|         | <b>Node<br/>number</b> | <b>Edge<br/>number</b> | <b>Average<br/>degree</b> | <b>Graph<br/>diameter</b> | <b>Graph<br/>density</b> | <b>Clustering<br/>coefficient</b> | <b>Average<br/>Path length</b> |
|---------|------------------------|------------------------|---------------------------|---------------------------|--------------------------|-----------------------------------|--------------------------------|
| CK-15d  | 85                     | 796                    | 18.729                    | 3                         | 0.223                    | 0.215                             | 1.622                          |
| LL-15d  | 75                     | 552                    | 14.72                     | 3                         | 0.199                    | 0.131                             | 1.711                          |
| LH-15d  | 94                     | 662                    | 14.085                    | 10                        | 0.151                    | 0.698                             | 3.531                          |
| CK-30d  | 100                    | 897                    | 17.94                     | 5                         | 0.181                    | 0.062                             | 1.983                          |
| LL-30d  | 73                     | 770                    | 21.096                    | 2                         | 0.293                    | 0.104                             | 1.479                          |
| LH-30d  | 93                     | 556                    | 11.957                    | 11                        | 0.13                     | 0.613                             | 3.791                          |
| LPL-15d | 100                    | 629                    | 12.58                     | 8                         | 0.127                    | 0.12                              | 3.427                          |
| LPH-15d | 90                     | 505                    | 11.22                     | 11                        | 0.126                    | 0.572                             | 3.593                          |
| LPL-30d | 86                     | 767                    | 17.837                    | 6                         | 0.21                     | 0.205                             | 2.808                          |
| LPH-30d | 91                     | 375                    | 8.242                     | 13                        | 0.092                    | 0.481                             | 3.926                          |
| PL-15d  | 90                     | 556                    | 12.356                    | 3                         | 0.139                    | 0.122                             | 1.91                           |
| PH-15d  | 93                     | 471                    | 10.129                    | 9                         | 0.11                     | 0.495                             | 3.513                          |
| PL-30d  | 83                     | 692                    | 16.675                    | 3                         | 0.203                    | 0.059                             | 1.774                          |
| PH-30d  | 99                     | 570                    | 11.515                    | 2                         | 0.118                    | 0.708                             | 1.882                          |

Note: LL: phthalic acid <250mg/kg; LH: phthalic acid >250mg/kg; PL: palmitic acid <250mg/kg; PH: phthalic acid >250mg/kg; LPL: mixed organic acids <250mg/kg; LPH: mixed organic acids >250mg/kg.

**Table S8.** Metabolic pathway description of differential metabolites under different organic acids.

| Organic acid species              | Different Pathway Description                                                                                                                                                                                                                                                          | Same Pathway Description                                                                   |
|-----------------------------------|----------------------------------------------------------------------------------------------------------------------------------------------------------------------------------------------------------------------------------------------------------------------------------------|--------------------------------------------------------------------------------------------|
| Phthalic acid<br>(<250mg/kg)      | Synthesis and degradation of ketone bodies<br>Fructose and mannose metabolism                                                                                                                                                                                                          | Steroid hormone biosynthesis<br>Flavonoid biosynthesis                                     |
| Phthalic acid<br>(>250mg/kg)      | —                                                                                                                                                                                                                                                                                      | Steroid hormone biosynthesis<br>Flavonoid biosynthesis                                     |
| Palmic acid<br>(<250mg/kg)        | Biosynthesis of alkaloids derived from shikimate pathway<br>Synthesis and degradation of ketone bodies<br>Biosynthesis of plant secondary metabolites<br>Fructose and mannose metabolism<br>Biosynthesis of plant hormones<br>Biosynthesis of phenylpropanoids<br>Galactose metabolism | Steroid hormone biosynthesis                                                               |
| Palmic acid<br>(>250mg/kg)        | Ubiquinone and other terpenoid-quinone biosynthesis<br>Flavonoid biosynthesis                                                                                                                                                                                                          | Steroid hormone biosynthesis                                                               |
| Mixed organic acid<br>(<250mg/kg) | alpha-Linolenic acid metabolism<br>Butanoate metabolism                                                                                                                                                                                                                                | Steroid hormone biosynthesis<br>Linoleic acid metabolism<br>Primary bile acid biosynthesis |
| Mixed organic acid<br>(>250mg/kg) | Amino sugar and nucleotide sugar metabolism<br>Biosynthesis of plant hormones                                                                                                                                                                                                          | Steroid hormone biosynthesis<br>Linoleic acid metabolism<br>Primary bile acid biosynthesis |

**Table S9.** The path analysis data for CK (\*\*p <0.01, \*\*\*p <0.001).

| X               | → | Y                   | Unstandardized Coefficients | Standardized Coefficients | S.E.  | C.R.    | P        |
|-----------------|---|---------------------|-----------------------------|---------------------------|-------|---------|----------|
| Plant           | → | Metabolites         | -0.361                      | -0.247                    | 0.817 | -0.442  | 0.658    |
| Plant           | → | Edaphic factors     | 1.089                       | 0.746                     | 0.132 | 8.254   | 0.000*** |
| Metabolites     | → | Edaphic factors     | 0.859                       | 0.859                     | 0.090 | 9.511   | 0.000*** |
| Plant           | → | Bacterial α-shannon | -0.156                      | -0.753                    | 0.079 | -1.963  | 0.050**  |
| Metabolites     | → | Bacterial α-shannon | 0.044                       | 0.312                     | 0.062 | 0.709   | 0.478    |
| Edaphic factors | → | Bacterial α-shannon | -0.042                      | -0.297                    | 0.071 | -0.591  | 0.555    |
| Plant           | → | Fungal α-shannon    | 0.114                       | 0.233                     | 0.040 | 2.855   | 0.004*** |
| Metabolites     | → | Fungal α-shannon    | -0.304                      | -0.907                    | 0.027 | -11.121 | 0.000*** |

**Table S10.** The path analysis data for phthalic acid conditions.

| X               | → Y                           | Unstandardized Coefficients | Standardized Coefficients | S.E.  | C.R.   | P        |
|-----------------|-------------------------------|-----------------------------|---------------------------|-------|--------|----------|
| Plant           | → Metabolites                 | -0.550                      | -0.708                    | 0.224 | -2.458 | 0.014**  |
| Plant           | → Edaphic factors             | 0.229                       | 0.793                     | 0.066 | 3.483  | 0.000*** |
| Metabolites     | → Edaphic factors             | -0.062                      | -0.167                    | 0.085 | -0.734 | 0.463    |
| Plant           | → Bacterial $\alpha$ -shannon | 0.041                       | 0.590                     | 0.063 | 0.650  | 0.516    |
| Metabolites     | → Bacterial $\alpha$ -shannon | 0.021                       | 0.240                     | 0.048 | 0.441  | 0.659    |
| Edaphic factors | → Bacterial $\alpha$ -shannon | -0.167                      | -0.698                    | 0.224 | -0.745 | 0.456    |
| Plant           | → Fungal $\alpha$ -shannon    | 0.158                       | 0.661                     | 0.020 | 8.086  | 0.000*** |
| Metabolites     | → Fungal $\alpha$ -shannon    | 0.125                       | 0.406                     | 0.015 | 8.265  | 0.000*** |
| Edaphic factors | → Fungal $\alpha$ -shannon    | 0.517                       | 0.624                     | 0.070 | 7.396  | 0.000*** |

Note: \*\*p < 0.01, \*\*\*p < 0.001.

**Table S11.** The path analysis data for palmitic acid conditions (\*p < 0.05, \*\*p < 0.01, \*\*\*p < 0.001).

| X               | → Y                           | Unstandardized Coefficients | Standardized Coefficients | S.E.  | C.R.    | P        |
|-----------------|-------------------------------|-----------------------------|---------------------------|-------|---------|----------|
| Plant           | → Edaphic factors             | -0.059                      | -0.674                    | 0.026 | -2.235  | 0.025**  |
| Plant           | → Metabolites                 | -0.692                      | -0.982                    | 0.055 | -12.565 | 0.000*** |
| Plant           | → Bacterial $\alpha$ -shannon | -0.007                      | -0.170                    | 0.016 | -0.408  | 0.683    |
| Edaphic factors | → Bacterial $\alpha$ -shannon | -0.340                      | -0.759                    | 0.187 | -1.821  | 0.069*   |
| Edaphic factors | → Fungal $\alpha$ -shannon    | -1.328                      | -0.568                    | 1.114 | -1.191  | 0.234    |
| Plant           | → Fungal $\alpha$ -shannon    | -0.021                      | -0.102                    | 0.097 | -0.214  | 0.830    |

**Table S12.** The path analysis data for mixed organic acid conditions (\*p < 0.05, \*\*\*p < 0.001).

| X               | → Y                           | Unstandardized Coefficients | Standardized Coefficients | S.E.  | C.R.   | P        |
|-----------------|-------------------------------|-----------------------------|---------------------------|-------|--------|----------|
| Plant           | → Metabolites                 | -0.555                      | -0.962                    | 0.064 | -8.660 | 0.000*** |
| Metabolites     | → Edaphic factors             | 1.169                       | 0.679                     | 0.321 | 3.639  | 0.000*** |
| Plant           | → Edaphic factors             | -0.320                      | -0.322                    | 0.185 | -1.725 | 0.084*   |
| Plant           | → Bacterial $\alpha$ -shannon | 0.010                       | 0.124                     | 0.046 | 0.220  | 0.826    |
| Metabolites     | → Bacterial $\alpha$ -shannon | -0.115                      | -0.807                    | 0.081 | -1.430 | 0.153    |
| Edaphic factors | → Fungal $\alpha$ -shannon    | -0.139                      | -0.886                    | 0.030 | -4.692 | 0.000*** |

**Table S13.** Correlation between fresh weight and physicochemical properties of plants under different organic acid conditions (\*p <0.05, \*\*p <0.01).

|                         | pH   | TN<br>mg/kg | TP<br>mg/kg | NH <sub>4</sub> <sup>+</sup> -N<br>mg/kg | NO <sub>3</sub> <sup>-</sup> -N<br>mg/kg | TK<br>g/kg | SOM<br>g/kg | WC<br>%    |
|-------------------------|------|-------------|-------------|------------------------------------------|------------------------------------------|------------|-------------|------------|
| Plant fresh weight (L)  | 0.27 | 0.80**      | 0.94**      | 0.57*                                    | -0.43                                    | 0.39       | 0.80**      | 0.99*<br>* |
| Plant fresh weight (P)  | 0.00 | 0.39        | 0.89**      | 0.60**                                   | -0.40                                    | 0.54*      | 0.36        | 0.11       |
| Plant fresh weight (LP) | 0.03 | -0.16       | 0.10        | -0.27                                    | -0.61**                                  | 0.33       | 0.10        | 0.25       |
| Plant fresh weight (CK) | 0.08 | 0.06        | -0.59       | 0.20                                     | 0.09                                     | 0.43       | 0.13        | 0.10       |

**Table S14.** Correlation between microbial (bacterial, fungal) diversity index (Shannon) and soil physicochemical properties (\*p <0.05, \*\*p <0.01).

|                        | pH     | TN<br>mg/kg | TP<br>mg/kg | NH <sub>4</sub> <sup>+</sup> -N<br>mg/kg | NO <sub>3</sub> <sup>-</sup> -N<br>mg/kg | TK<br>g/kg | SOC<br>g/kg | WC<br>% |
|------------------------|--------|-------------|-------------|------------------------------------------|------------------------------------------|------------|-------------|---------|
| Bacterial shannon (L)  | -0.51* | -0.46       | -0.66**     | -0.61**                                  | -0.43                                    | -0.26      | -0.47*      | -0.72** |
| Fungal shannon (L)     | 0.22   | 0.13        | 0.33        | 0.44                                     | 0.41                                     | -0.29      | 0.08        | 0.36    |
| Bacterial shannon (P)  | -0.58  | 0.40        | -0.18       | -0.36                                    | -0.11                                    | 0.54*      | 0.27        | -0.10   |
| Fungal shannon (P)     | -0.42  | 0.52*       | 0.25        | 0.04                                     | -0.36                                    | 0.55*      | 0.30        | 0.34    |
| Bacterial shannon (LP) | -0.03  | -0.47       | -0.52*      | -0.69**                                  | -0.61**                                  | 0.33       | -0.25       | 0.08    |
| Fungal shannon (LP)    | -0.13  | -0.29       | -0.44       | -0.61**                                  | -0.58*                                   | 0.57*      | 0.07        | 0.37    |
| Bacterial shannon (CK) | -0.66  | 0.44        | 0.49        | 0.29                                     | 0.37                                     | 0.43       | 0.27        | -0.22   |
| Fungal shannon (CK)    | -0.76  | 0.94**      | 0.22        | 0.87*                                    | 0.90*                                    | 0.84*      | 0.95**      | 0.29    |



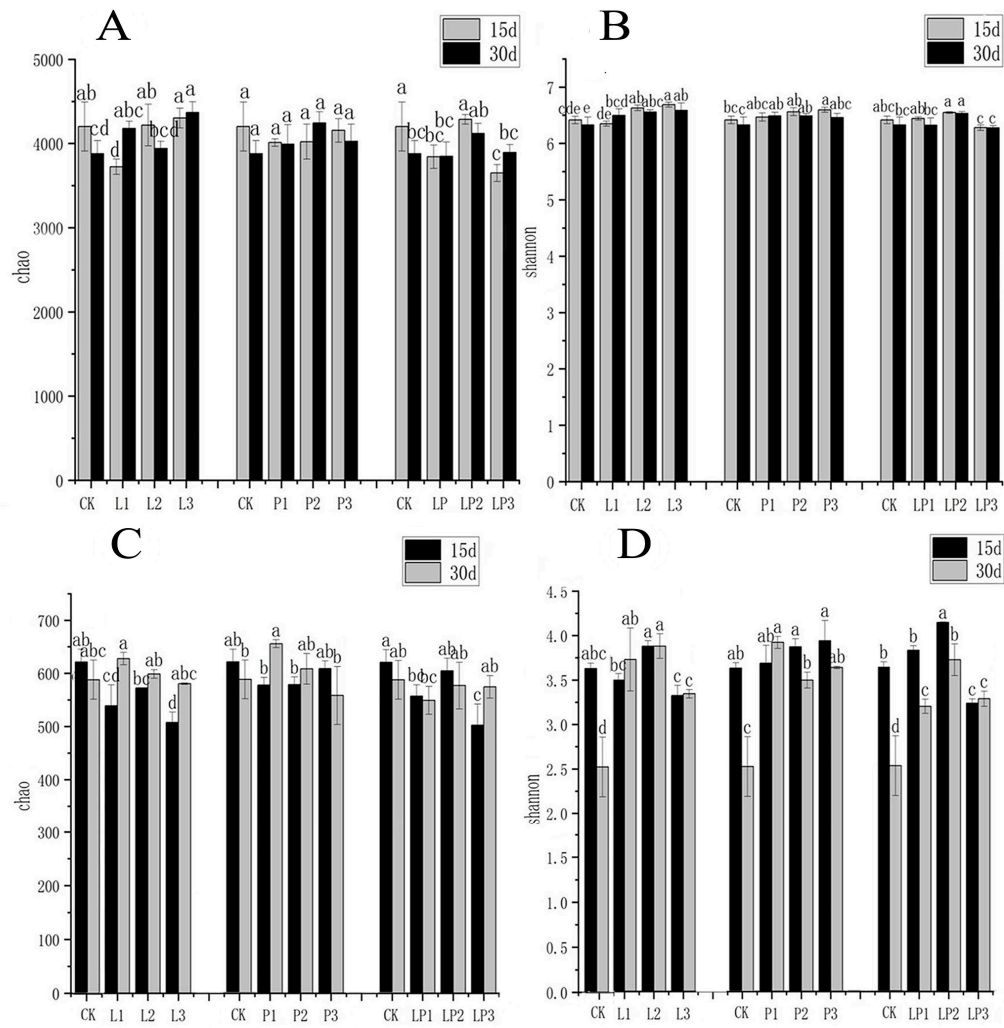

**Figure S2.** Shannon index and chao index of bacteria and fungi. (A) bacterial chao index, (B) bacterial shannon index, (C) fungal chao index, and (D) fungal shannon index.

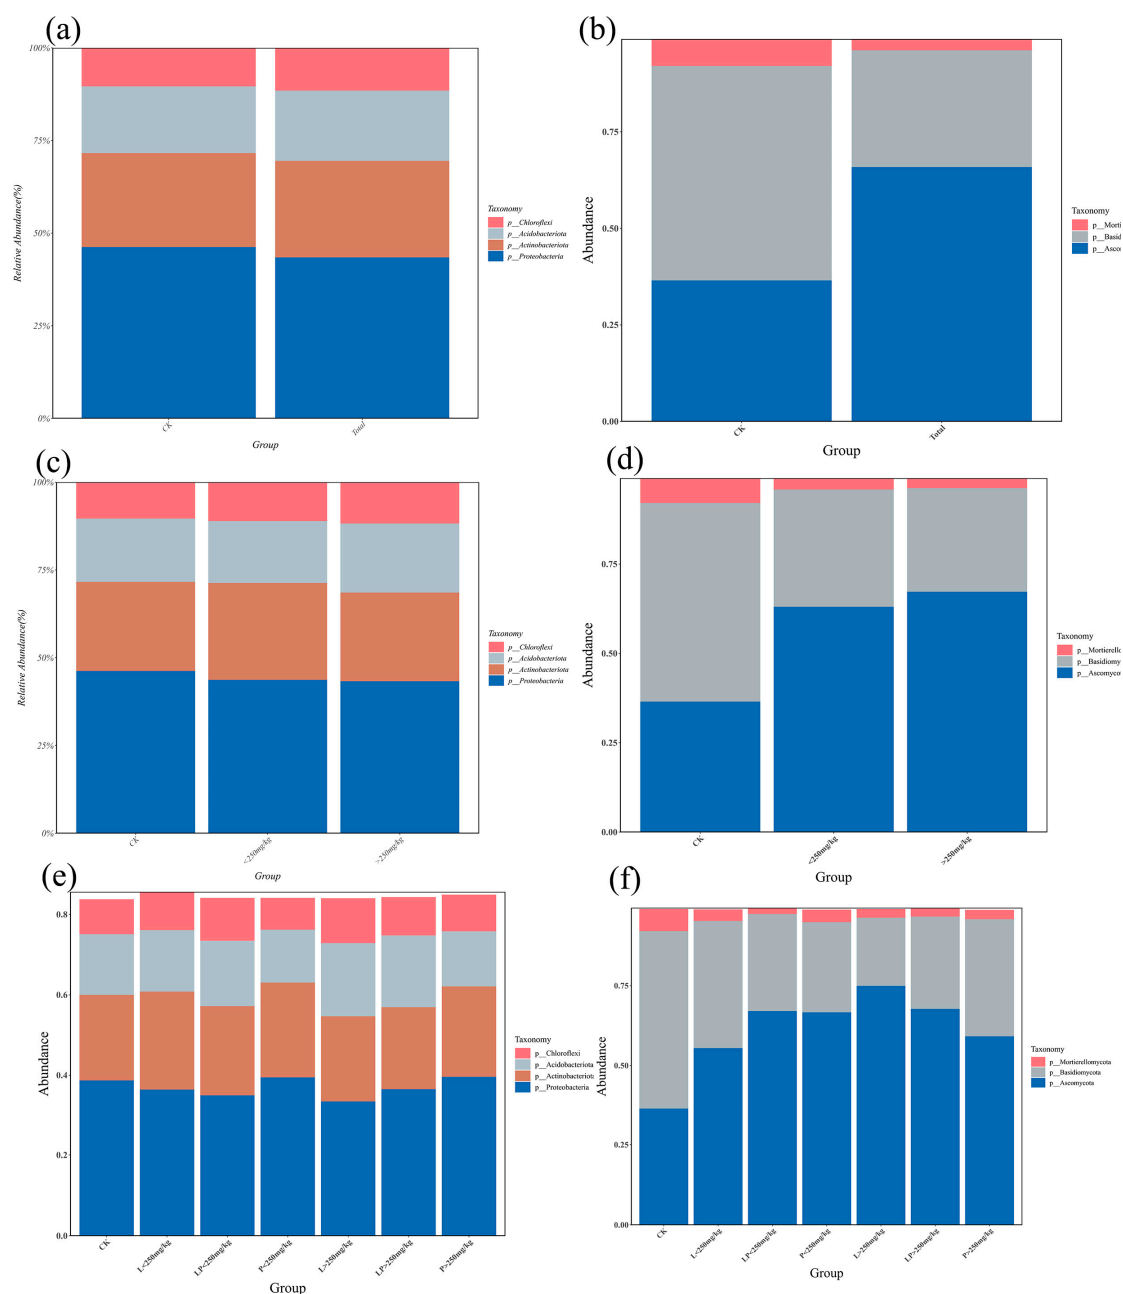

**Figure S3.** The relative abundance of the bacterial (a, c, e) and fungal (b, d, f) communities at the phylum level.





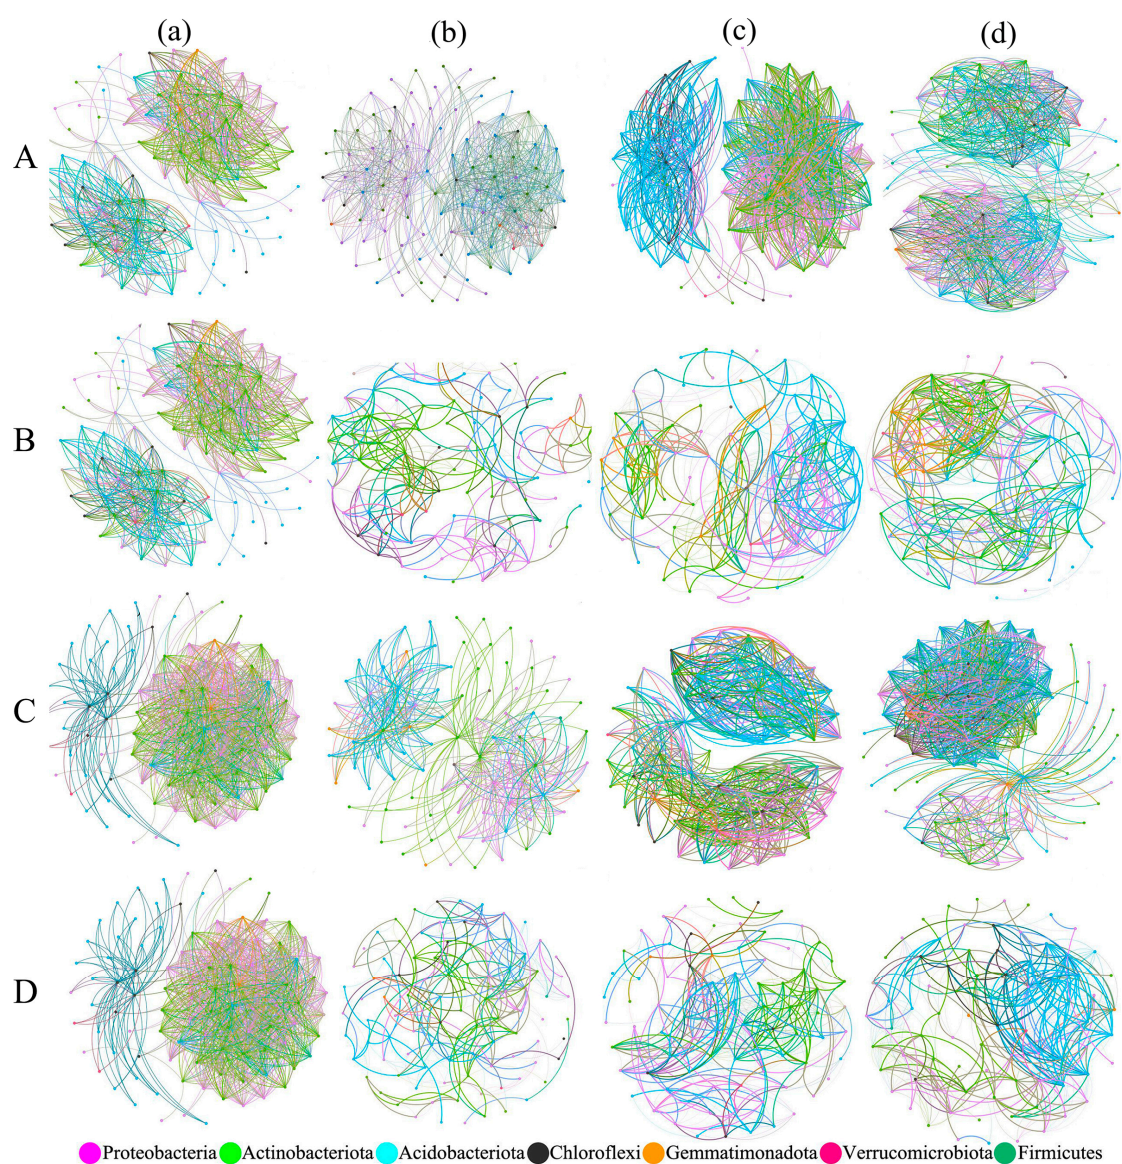

**Figure S5.** Changes in the complexity of bacterial networks under different organic acids. (A, C) organic acids concentrations < 250mg/kg, respectively. (B, D) organic acids concentrations > 250mg/kg, respectively. (a, b, c, and d) CK, phthalic, palmitic, and mixed organic acids treatment.

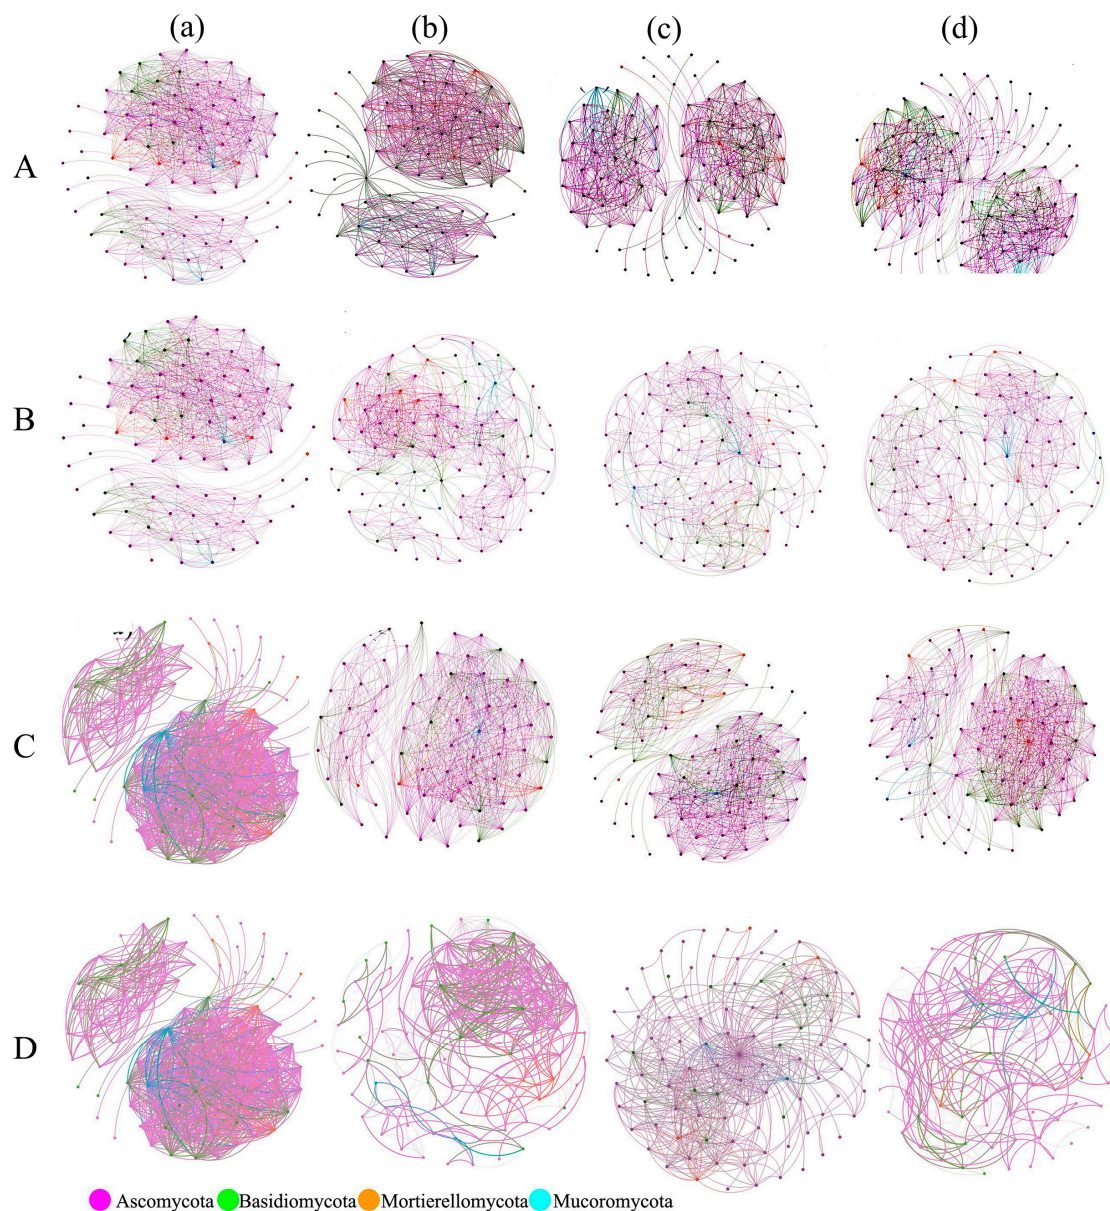

**Figure S6.** Changes in the complexity of fungal networks under different species organic acids. (A, C) organic acids concentrations < 250mg/kg, respectively. (B, D) organic acids concentrations > 250mg/kg, respectively. (a, b, c, and d) CK, phthalic, palmitic, and mixed organic acids treatment.

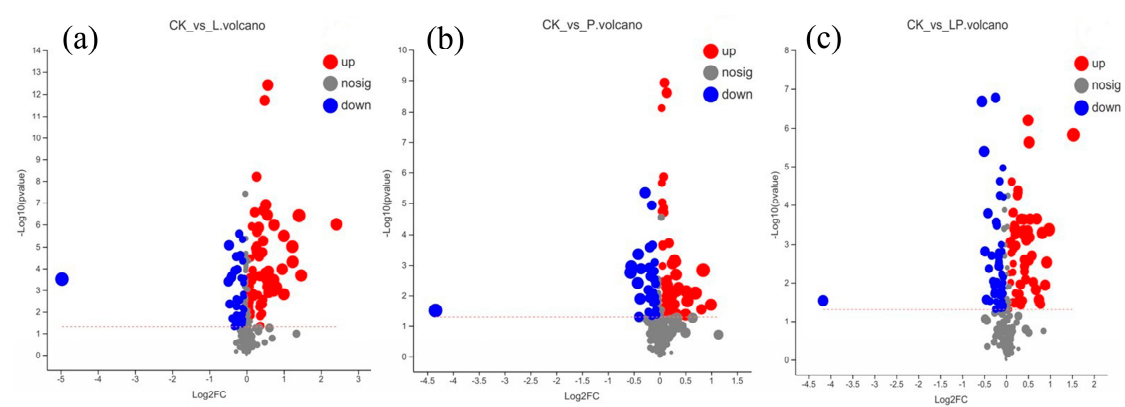

**Figure S7.** Volcano plot showing the different metabolites with different organic acid treatments ( $P < 0.05$ ,  $\text{VIP} > 1$ ). (a), phthalic acid treatment; (b), palmitic acid treatment; (c), mixed organic acid treatment.



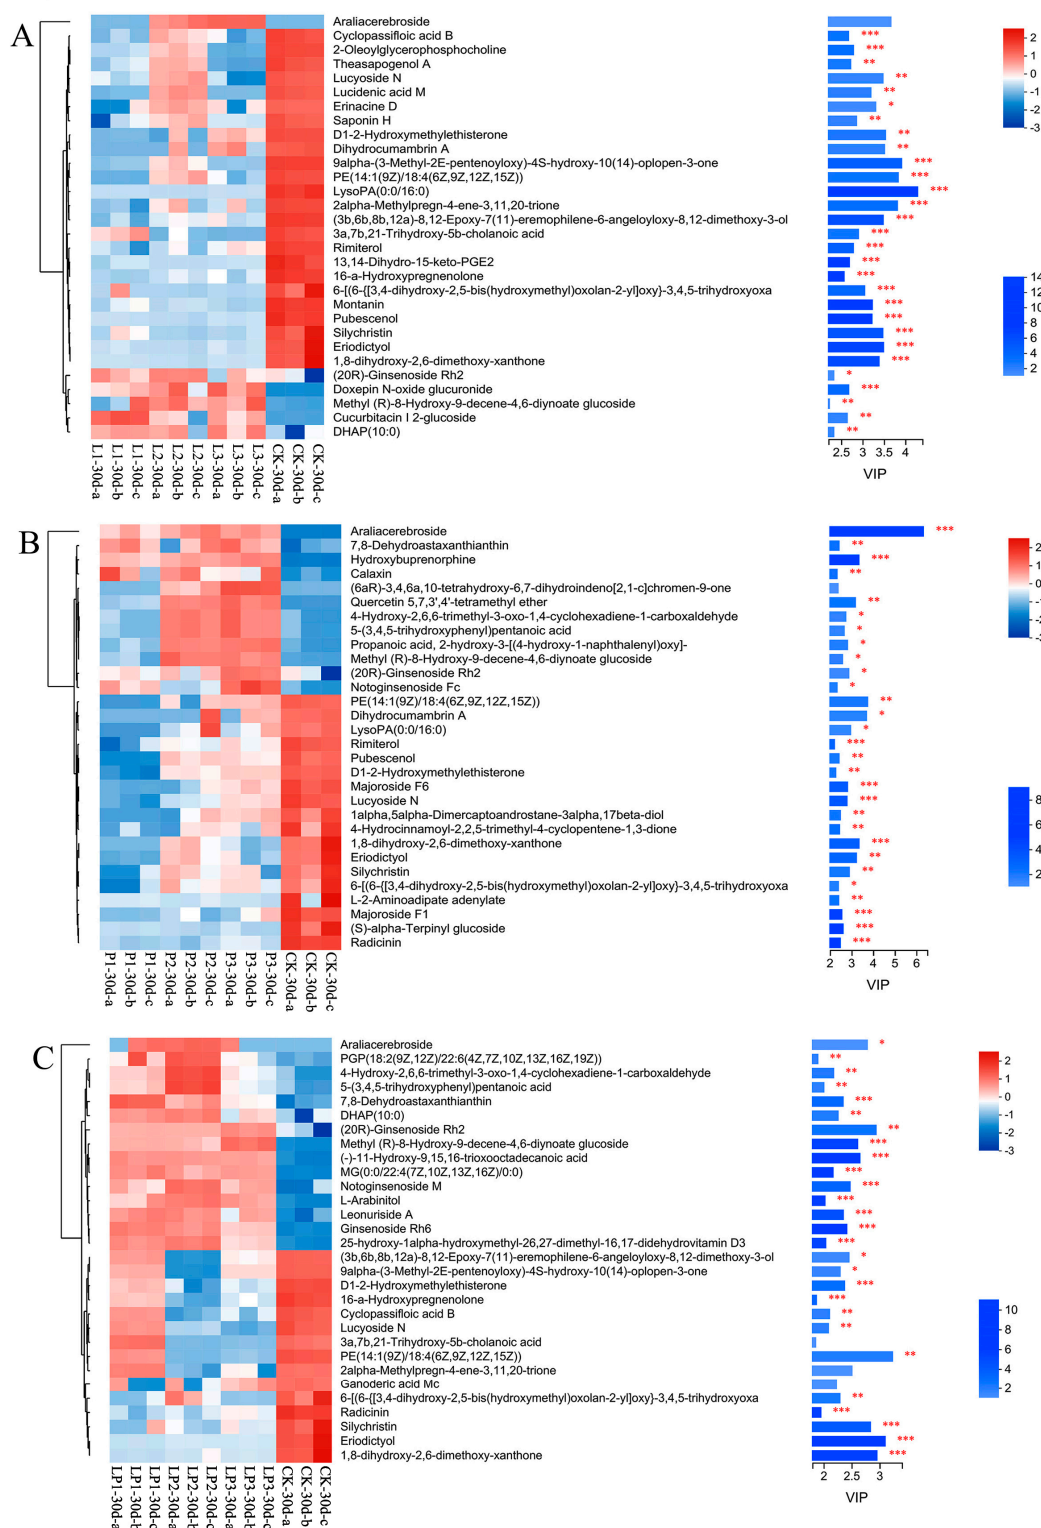

**Figure S8.** VIP values in the OPLS-DA model (VIP values >1.0) showing DMs under the three organic acid treatments. \*\*\*,  $p < 0.001$ ; \*\*,  $p < 0.01$ ; \*,  $p < 0.05$ . (A), phthalic acid treatment (30 days); (B), palmitic acid treatment (30 days); (C), mixed organic acid treatment (30 days).

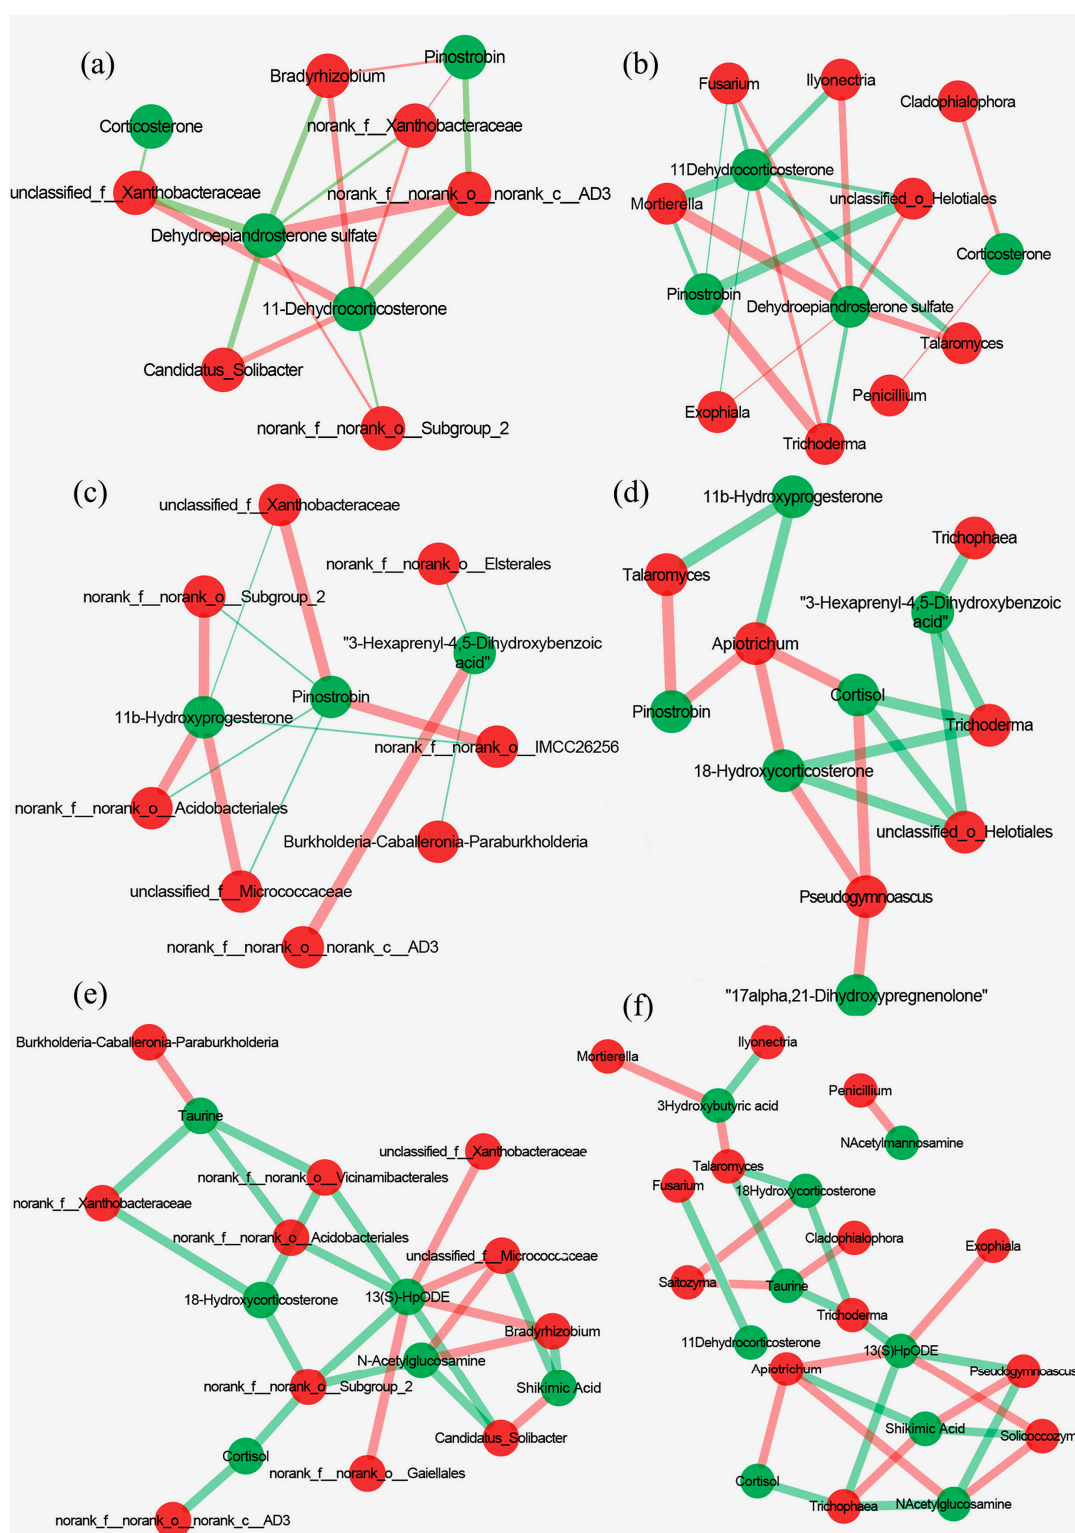

**Figure S9.** Network analysis of the top 15 bacteria, fungi and DMs. Red and green indicate positive and negative correlation, respectively ( $P < 0.05$ ). The red circle represent bacteria and fungi, the green circle represent metabolites. (a) and (b) phthalic acid conditions. (c) and (d) palmitic acid conditions. (e) and (f) mixed organic acid conditions.
